# Supplementary material for: Mutual potentiation drives synergy between trimethoprim and sulfamethoxazole
Source: PubMed Central journal article supplement (PMC5843663; doi:10.1038/s41467-018-03447-x), 2018-03-08
Supplement: 41467_2018_3447_MOESM1_ESM.pdf [file 41467_2018_3447_MOESM1_ESM.pdf]

# **Mutual Potentiation Drives Synergy between Trimethoprim and Sulfamethoxazole**

**Minato et al.**

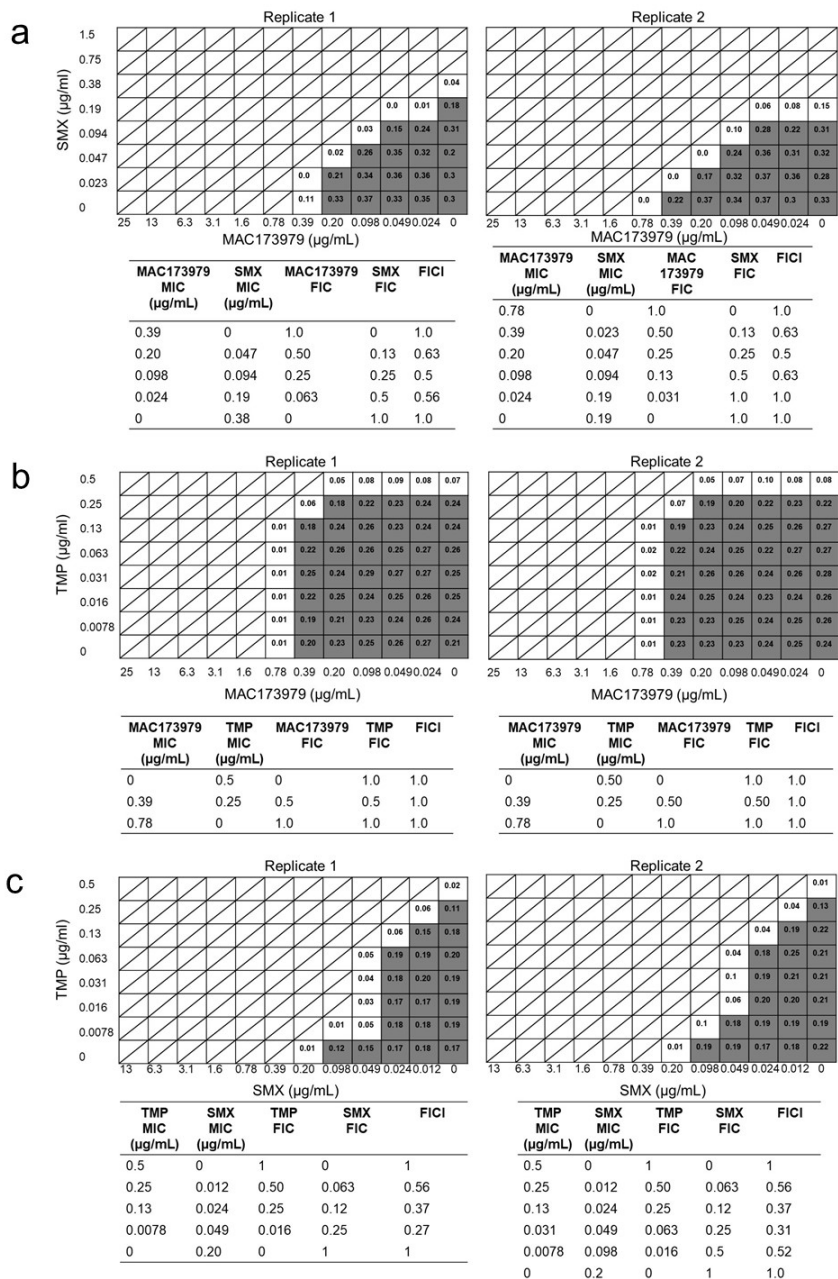

**Supplementary Figure 1. Inhibitory activity of combinations of anti-folate compounds.** *E. coli* BW25113 strain was grown overnight in LB medium. Cultures were washed twice and resuspended in M9-glucose, then inoculated into a 96 well flat bottom plate (Corning) containing the same medium with combinations of a range of concentrations of (A) SMX and MAC173979, (B) TMP and MAC173979, or (C) TMP and SMX. MICs were read spectrophotometrically (OD<sub>600</sub>) to determine the minimum amount of antimicrobial agent required to inhibit at least 50% of growth relative to a no drug control after 24 hr incubation at 37 °C. Concentration ranges were; SMX (0.023 - 13 µg/ml), TMP (0.0078-0.5 µg/ml), MAC173979 (0.024 - 25 µg/ml). MICs were

determined by visible growth after 24 hr incubation at 37 °C. Synergy was assessed by calculating FICI. Data represents two independent replicates.

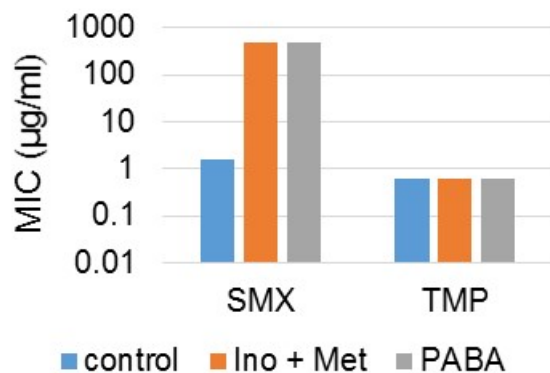

**Supplementary Figure 2. Effects of inosine (Ino) and methionine (Met), PABA on SMX and TMP MICs against *E.coli* BW25113.** Ino, Met, and PABA were added to the media at 10 µg/ml. MICs were determined after 24 hour incubation at 37 °C in M9-glucose media. Representative data from at least three individual experiments are shown.

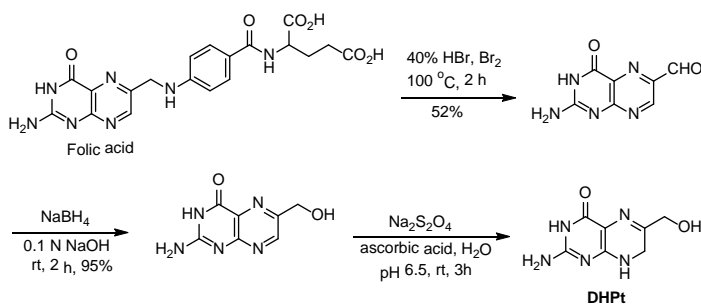

**Supplementary Figure 3. Synthesis of DHPt.**

**Supplementary Table 1. MICs of ceftazidime and ciprofloxacin against *E. coli* BW25113 strains.**

| Strains             | MIC ( $\mu\text{g/ml}$ ) |               |
|---------------------|--------------------------|---------------|
|                     | Ceftazidime              | Ciprofloxacin |
| BW25113 (wild type) | 0.02-0.04                | 0.005-0.01    |
| $\Delta nudB$       | 0.02-0.04                | 0.005-0.01    |

MIC, Minimum concentration of antimicrobial agent required to inhibit at least 50% of growth relative to a no drug control after 24 hours of incubation at 37 °C

**Supplementary Table 2. MICs of SMX and TMP against *E. coli* BW25113 strains.**

| Strains                  | MIC ( $\mu\text{g/ml}$ ) |     |
|--------------------------|--------------------------|-----|
|                          | SMX                      | TMP |
| BW25113 (wild type)      | 1.6                      | 0.6 |
| $\Delta nudB/pUC19-nudB$ | 1.6                      | 0.6 |
| $\Delta gcvP/pUC19-gcvP$ | 1.6                      | 0.6 |
| $\Delta gcvH/pUC19-gcvH$ | 1.6                      | 0.6 |
| $\Delta gcvT/pUC19-gcvT$ | 1.6                      | 0.6 |

MIC, Minimum concentration of antimicrobial agent required to inhibit at least 50% of growth relative to a no drug control after 24 hours of incubation at 37 °C; SMX, sulfamethoxazole; TMP, trimethoprim

**Supplementary Table 3. Plasmids and bacterial strains used in this study**

| Strains/plasmid         | Descriptions                                                     | Source or reference          |
|-------------------------|------------------------------------------------------------------|------------------------------|
| WT                      | <i>E.coli</i> BW25113                                            | Keio collection <sup>1</sup> |
| $\Delta pabC$           | BW25113 <i>pabC</i> ::km, kanamycin resistant (Km <sup>r</sup> ) | Keio collection <sup>1</sup> |
| $\Delta nudB$           | BW25113 <i>nudB</i> ::km, Km <sup>r</sup>                        | Keio collection <sup>1</sup> |
| $\Delta glyA$           | BW25113 <i>glyA</i> ::km, Km <sup>r</sup>                        | Keio collection <sup>1</sup> |
| $\Delta gcvP$           | BW25113 <i>gcvP</i> ::km, Km <sup>r</sup>                        | Keio collection <sup>1</sup> |
| $\Delta gcvH$           | BW25113 <i>gcvH</i> ::km, Km <sup>r</sup>                        | Keio collection <sup>1</sup> |
| $\Delta gcvT$           | BW25113 <i>gcvT</i> ::km, Km <sup>r</sup>                        | Keio collection <sup>1</sup> |
| $\Delta ygfA$           | BW25113 <i>ygfA</i> ::km, Km <sup>r</sup>                        | Keio collection <sup>1</sup> |
| <i>E. coli</i> B11      | Clinical isolate of <i>E. coli</i>                               | Betsy Hirsch <sup>2</sup>    |
| <i>S. aureus</i> USA300 | methicillin-resistant <i>Staphylococcus aureus</i> strain        | <sup>3</sup>                 |
| pUC19                   | Cloning vector, Penicillin resistant (Pen <sup>r</sup> )         | <sup>4</sup>                 |
| pUC19- <i>nudB</i>      | <i>nudB</i> cloned into pUC19, Pen <sup>r</sup>                  | This study                   |
| pUC19- <i>gcvP</i>      | <i>gcvP</i> cloned into pUC19, Pen <sup>r</sup>                  | This study                   |
| pUC19- <i>gcvH</i>      | <i>gcvH</i> cloned into pUC19, Pen <sup>r</sup>                  | This study                   |
| pUC19- <i>gcvT</i>      | <i>gcvT</i> cloned into pUC19, Pen <sup>r</sup>                  | This study                   |

**Supplementary Table 4. Primers used in this study.**

| Primer          | Sequence (5' to 3')            |
|-----------------|--------------------------------|
| Fw_ECnudB_BamHI | CGGGATCCGTGAAGGATA AAGTGTATAA  |
| Re_ECnudB_EcoRI | CGGAATTCTCAGGCAGCGTTAATTACAA   |
| Fw_ECgcvP_BamHI | CGGGATCCATGACACAGA CGTTAAGCCA  |
| Re_ECgcvP_EcoRI | CGGAATTCTTACTGGTATTCGCTAATCGG  |
| Fw_ECgcvH_BamHI | CGGGATCCATGAGCAACG TACCAGCAGA  |
| Re_ECgcvH_EcoRI | CGGAATTCTTACTCGTCTTCTAACAATG   |
| Fw_ECgcvT_BamHI | CGGGATCCATGGCACAAC AGACTCCTTT  |
| Re_ECgcvT_EcoRI | CGGAATTCTCACGCGACGGCTTTGCCGTTA |

**Supplementary Table 5. Key fragmentation and optimized mass spectrometer (QTRAP 5500) conditions.**

| Compound               | Precursor ion                                                                                                                 | Product ion                                                                                              | CE (V) |
|------------------------|-------------------------------------------------------------------------------------------------------------------------------|----------------------------------------------------------------------------------------------------------|--------|
| DHPt                   | 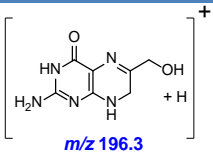<br><i>m/z 196.3</i>                         | <br><i>m/z 165.1</i>    | 27.0   |
| 6-Hydroxymethyl pterin | <br><i>m/z 194.1</i>                         | $[M-H_2O]^+$<br><i>m/z 176.1</i>                                                                         | 27.0   |
| DHN                    | <br><i>m/z 256.0</i>                         | <br><i>m/z 165.1</i>    | 25.0   |
| Neopterin              | <br><i>m/z 254.1</i>                        | <br><i>m/z 182.1</i>  | 25.0   |
| Hydroxypetroic acid    | <br><i>m/z 328.9</i><br>Internal Standard  | $[M-H_2O]^+$<br><i>m/z 311.0</i>                                                                         | 20.0   |
| PABA                   | <br><i>m/z 138.05</i>                      | <br><i>m/z 94.07</i> | 20.0   |
| d <sub>4</sub> -PABA   | <br><i>m/z 142.08</i><br>Internal standard | <br><i>m/z 98.09</i> | 20.0   |

CE = Collision Energy; Declustering Potential (DP) = 35.0 V, Entrance Potential (EP) = 10.0 V, Collision Cell Exit Potential (CXP) = 15.0 V were kept constant for all transitions.

## References.

- 1 Baba, T. *et al.* Construction of Escherichia coli K-12 in-frame, single-gene knockout mutants: the Keio collection. *Mol Syst Biol* **2**, 2006.0008, doi:10.1038/msb4100050 (2006).
- 2 Hirsch, E. B. *et al.* Activity of fosfomycin and comparison of several susceptibility testing methods against contemporary urine isolates. *Int J Antimicrob Agents* **46**, 642-647, doi:10.1016/j.ijantimicag.2015.08.012 (2015).
- 3 Kennedy, A. D. *et al.* Epidemic community-associated methicillin-resistant Staphylococcus aureus: recent clonal expansion and diversification. *Proc Natl Acad Sci U S A* **105**, 1327-1332, doi:10.1073/pnas.0710217105 (2008).
- 4 Yanisch-Perron, C., Vieira, J. & Messing, J. Improved M13 phage cloning vectors and host strains: nucleotide sequences of the M13mp18 and pUC19 vectors. *Gene* **33**, 103-119 (1985).
